# Supplementary material
Source: Elsevier journal article supplement (https://www.sciencedirect.com/science/article/pii/S0870255116303870)
Supplement: mmc1 [file S0870255116303870:mmc1.docx]

## Tabela Suplementar 1: Avaliação da qualidade dos estudos analisados para a revisão sobre EA-paradoxal

| **Estudo** | **Seleção** | **Desenho** | **Variáveis confundimento** | **“Blinding”** | **Metodologia** | **“Withdrawals Drop-Outs”** | **Avaliação Global** |
| --- | --- | --- | --- | --- | --- | --- | --- |
| Hachicha, 2007 (8) | Fraco | Moderado | Forte | Moderado | Forte | Forte | Moderado |
| Lee, 2011 (13) | Forte | Moderado | Forte | Moderado | Forte | Moderado | Moderado |
| Jander 2011 (52) | Forte | Moderado | Forte | Forte | Forte | Moderado | Forte |
| Clavel, 2012 (10) | Fraco | Moderado | Forte | Moderado | Forte | Moderado | Moderado |
| Mohty, 2013 (17) | Fraco | Moderado | Forte | Moderado | Forte | Forte | Moderado |
| O´Sullivan, 2013 (56) | Forte | Moderado | Forte | Moderado | Forte | Forte | Forte |
| Eleid, 2013 (53) | Fraco | Moderado | Forte | Moderado | Forte | Forte | Moderado |
| Herman, 2013 (50) | Fraco | Moderado | Forte | Forte | Forte | Forte | Moderado |
| Ozkan, 2013 (54) | Fraco | Moderado | Forte | Moderado | Forte | Forte | Moderado |
| Eleid, 2013 (7) | Fraco | Moderado | Forte | Moderado | Forte | Forte | Moderado |
| Mohty 2014 (55) | Fraco | Moderado | Forte | Moderado | Forte | Moderado | Moderado |
| Clavel, 2014 (41) | Fraco | Moderado | Forte | Moderado | Forte | Moderado | Moderado |
| Maes, 2014 (22) | Fraco | Moderado | Forte | Moderado | Forte | Forte | Moderado |
| Lauten 2014 (57) | Forte | Moderado | Forte | Forte | Forte | Moderado | Forte |
